# Supplementary material for: Characterization and Comparison of Unfermented and Fermented Seed-Watermelon Juice
Source: Hindawi journal article supplement (doi:10.1155/2018/4083903), 2018-10-29
Supplement: f1 [file 4083903.f1.xls]

## Sheet: Volatile
Type	Assigned compounds	Aroma characteristic	Unfermented juice (mg/L)	Fermented juice (mg/L)
Esters	Ethyl acetate	Bouquet with a light fruit smell (fruit, fragrant, bouquet)	-*	21.3±1.58
	Isoamyl acetate	Banana-like aroma (fruit)	-	13.0±0.67
	Ethyl octanoate	Brandy aroma with sweet smell (bouquet and fragrant)	-	30. 5±2.32
	Heptyl formate	fruit, flower, and oil)	-	11.0±1.02
	Ethyl nonanoate	Fruit and brandy-like aroma (Oil, fruit, and bouquet)	-	2.42±0.36
	2-methylpropyl octanoate		-	0.91±0.05
	Ethyl decanoate	Coconut aroma (Fruit)	-	65.8±2.81
	Ethyl undecanoate	Bouquet, oil, fruit	-	1.23±0.24
	Phenethyl acetate	Sweet aroma (Fragment)	-	1.01±0.2
	Ethyl laurate	Fragment and fruit	-	35.4±1.55
	3-methylbutyl decanoate		-	5.46±0.84
	Ethyl myristate	Coconut and iris-like aroma, and sweetness (Fruit and fragment)	-	11.7±0.87
	Ethyl pentadecanoate		-	0.61±0.05
	Ethyl palmitoleate	fruit and cream aroma (Fruit and oil)	-	4.34±1.21
		Subtotal	0	174.18
Alcohols	Isobutanol	Bouquet	-	2.73±0.24
	Isoamylol	There are Calvados aroma and spicy (Bouquet)	8.27±1.25	17.3±1.10**
	Hexanol	Grass, fragment, fruit, and oil	74.2±7.64	22.1±0.87**
	2,3-butanediol		-	1.07±0.09
	Octanol	Fruit, flower, and grass	8.06±1.55	11.9±1.17**
	1-methoxy-2-butanol		-	0.91±0.04
	1-nonanol	Watermelon-like aroma (Flower and fruit)	24.13±2.31	14.8±0.87**
	3,6-nonadien-1-ol	Watermelon-like aroma (Fruit)	14.65±1.02	11.0±1.24**
	Phenylethanol	pleasant and lasting fragrance of roses (Flower)	-	40.3±2.91
	Tridecanol		4.32±0.32	3.54±0.23**
	Alaninol		3.37±0.48	-
	3-hexen-1-ol	strong smell of grass and fresh tea (Grass)	14.4±1.24	-
	Trans-2-hexen-1-ol	Fruit and grass	1.54±0.09	-
	1-octen-3-ol	Mushroom and mud-like aroma (Grass)	5.71±1.02	-
	Heptanol	Citrus aroma (Fruit and oil)	6.53±1.45	-
	2-ethylhexan-1-ol	Sweet and light fragrance (Flower)	8.44±2.52	-
	Benzyl alcohol	Light flower aroma (Flower)	1.75±0.07	-
	Nerolidol		2.17±0.73	-
		Subtotal	177.54	125.65
Alkanes	4-vinyl-2-methoxyphenol	Flower, bouquet, and fruit	-	0.41±0.02
	1,3-di-tert-butylbenzene		18.4±1.62	-
	Tridec-1-yne		2.86±0.21	-
	β-caryophyllene	Light clove fragrance (Flower)	5.37±1.24	224±10.8**
	Valencene	Citrus aroma (Fruit)	5.77±0.88	-
	2,4-di-tert-butylphenol		6.87±0.79	-
		Subtotal	39.27	224.41
Aldehyde and ketones	Nonanal	Watermelon aroma, sweet with beeswax flower (Fruit, flower)	12.9±1.25	0.61±0.02**
	Trans-2-nonenal	Watermelon and cucumber-like aroma (Fruit)	16.8±2.06	-
	Trans,cis-2-6-nonadienal	Watermelon-like aroma (Fruit)	23.6±2.18	-
	β-cyclocitral	Fruit and flower	8.38±1.38	-
	β- jonone	Violet aroma (Flower)	2.96±0.63	-
	3-hydroxy-2-oxobutane	Cream aroma (Oil)	6.09±1.24	-
		Subtotal	70.73	0.61
Acids	Acetic acid		-	6.72±1.54
	Octanoate	Fruit	2.38±0.35	5.36±2.08**
	Decanoic acid		-	7.14±0.96
		Subtotal	2.38	19.22

## Sheet: Volatile distributions
					Juice	Fermented juice					Juice	Fermented juice
				Alkanes	39.27	224.41				Flower	71.79	303.02
				Alcohols	177.54	125.65				Fruit	207.21	232.37
				Aldehydes and ketones	70.73	0.61				Grass	103.91	34
				Acids	2.38	19.22				Fragrant	74.2	31.5
				Esters	0	174.18				Oil	86.82	41.09
					289.92	544.07				Bouquet	8.27	45.39

## Sheet: DPPH
Trolox		BHT		Unfermented juice		Fermented juice
T（mg/ml）	.DPPH	BHT（mg/ml）	.DPPH	Concentration	.DPPH	concentration	.DPPH
0.005	0.0692202	0.02	0.182216	0.001	0.141594	0.001	0.290707
0.014	0.27948	0.056	0.43844	0.01	0.164723	0.01	0.30164
0.023	0.624897	0.092	0.57606	0.1	0.180466	0.1	0.413782
0.032	0.798222	0.128	0.648837	1	0.41516	1	0.45453
0.041	0.822298	0.164	0.683858
0.05	0.828591	0.2	0.703557

## Sheet: OH
Trolox		BHT		Unfermented juice		Fermented juice
T浓度	.OH	BHT	.OH	concentration	.OH	concentration	.OH
0.005	0.366013	0.02		0.001	0.156445	0.001	0.108887
0.014	0.428727	0.056		0.01	0.319393	0.01	0.220451
0.023	0.498133	0.092		0.1	0.325258	0.1	0.408262
0.032	0.565359	0.128		1	0.946194	1	0.957797
0.041	0.6676	0.164			0.232997		0.265898
0.05	0.6939	0.2
	0.0219499
IC50	0.00285327				0.329045		0.352183
													0.001	0.156445	0.001	0.108887
													0.01	0.319393	0.01	0.220451
													0.1	0.325258	0.1	0.408262
													0.25	0.49	0.25	0.64
													0.5	62	0.5	0.75
													0.75	0.83	0.75	0.88
													1	0.946194	1	0.957797

## Sheet: ORAC
Trolox		BHT		Unfermented juice		Fermented juice
T浓度	ORAC	BHT浓度	ORAC	Concentration	ORAC	Concentration	ORAC
0.005	5119119	0.02		0.001	8.11026e+06	0.001	9455609
0.01	1.49195e+07	0.056		0.01	11023964	0.01	2.11549e+07
0.02	2.31851e+07	0.092		0.1	3.4384e+07	0.1	5.90348e+07
0.04	4.2364e+07	0.128		1	6.00986e+07	1	61968119
	2.1182e+07	0.164			3.00493e+07		3.09841e+07
	1.87838e+07	0.2			2.43289e+06		3.36766e+06
IC50	0.018538				0.0656887		0.0909276
